# Supplementary material for: Breadmaking Performance of Elite Einkorn (Triticum monococcum L. subsp. monococcum) Lines: Evaluation of Flour, Dough and Bread Characteristics
Source: MDPI journal article supplement (doi:10.3390/foods12081610), 2023-04-10
Supplement: s1 [file s1]

**Table S2.** Two-way ANOVA results (\*  $p \leq 0.05$ ; \*\*  $p \leq 0.01$ ; \*\*\*  $p \leq 0.001$ ) of composition, rheological analysis and breadmaking test parameters.

| Rheological analysis and breadmaking test parameters. |             |            |             |        |       |
|-------------------------------------------------------|-------------|------------|-------------|--------|-------|
| VARIABLE                                              | GENOTYPE    |            | ENVIRONMENT | GxE    | ERROR |
|                                                       | (G)         | (E)        |             |        |       |
|                                                       | d.f.        | 2          | 3           | 6      | 12    |
| Moisture                                              | 0.057***    | 0.218***   | 0.379***    | 0.001  |       |
| Ash                                                   | 0.012***    | 0.003***   | 0.002***    | 0.0002 |       |
| Protein                                               | 95.7***     | 26.1***    | 5.0***      | 0.1    |       |
| Total pentosans                                       | 6.86***     | 2.06***    | 0.95*       | 0.21   |       |
| Soluble pentosans                                     | 0.695***    | 0.150***   | 0.007       | 0.020  |       |
| Starch                                                | 196.7***    | 12.3*      | 13.1*       | 3.0    |       |
| Amylose                                               | 6.42***     | 0.42       | 0.53        | 0.53   |       |
| Yellow pigment                                        | 230.6***    | 4.4***     | 1.3***      | 0.1    |       |
| Dry gluten                                            | 0.411***    | 0.124***   | 0.032*      | 0.008  |       |
| Falling number                                        | 12900***    | 1659***    | 1450***     | 129    |       |
| $\alpha$ -amylase                                     | 0.0054***   | 0.0019***  | 0.0011***   | 0.0001 |       |
| SDS sedimentation volume                              | 1512.8***   | 95.6**     | 146.7***    | 10.1   |       |
| Rheological analysis                                  |             |            |             |        |       |
| Strain sweep test:                                    |             |            |             |        |       |
| Deformation limit G'                                  | 0.347***    | 0.010***   | 0.002       | 0.001  |       |
| Deformation limit G''                                 | 0.279***    | 0.006      | 0.002       | 0.002  |       |
| Frequency sweep test:                                 |             |            |             |        |       |
| Storage modulus G'                                    | 17809700*** | 5869160*** | 4195290***  | 509008 |       |
| Loss modulus G''                                      | 10035300*** | 1473740*** | 921188***   | 101688 |       |
| $\tan\delta = G''/G'$                                 | 0.0256***   | 0.0022***  | 0.0027***   | 0.0001 |       |
| Breadmaking test                                      |             |            |             |        |       |
| Bread volume                                          | 24448***    | 117306***  | 56045***    | 164    |       |
| Bread height                                          | 182.4***    | 1155.8***  | 415.5***    | 5.6    |       |
