# Supplementary material for: Breadmaking Performance of Elite Einkorn (Triticum monococcum L. subsp. monococcum) Lines: Evaluation of Flour, Dough and Bread Characteristics
Source: MDPI journal article supplement (doi:10.3390/foods12081610), 2023-04-10
Supplement: s1 [file s1]

**Table S3.** Environmental values (mean  $\pm$  s.e.) of flour and bread parameters of two einkorns (ID331 and Monlis) and one bread wheat (Blasco). N=6: three accessions and two repetitions.

|                                         | <b>SAL</b>       | <b>SALbio</b>    | <b>LENObio</b>   | <b>ROMA</b>      |
|-----------------------------------------|------------------|------------------|------------------|------------------|
| <b>Flour</b>                            |                  |                  |                  |                  |
| Moisture (g/100 g)                      | 14.2 $\pm$ 0.2   | 14.5 $\pm$ 0.2   | 14.3 $\pm$ 0.2   | 14.6 $\pm$ 0.1   |
| Ash (g /100 g)                          | 0.62 $\pm$ 0.01  | 0.64 $\pm$ 0.017 | 0.60 $\pm$ 0.018 | 0.59 $\pm$ 0.021 |
| Protein (g/100 g)                       | 12.6 $\pm$ 0.6   | 16.3 $\pm$ 1.9   | 12.8 $\pm$ 1.4   | 16.3 $\pm$ 1.2   |
| Starch (g/100 g)                        | 63.8 $\pm$ 1.2   | 61.1 $\pm$ 2.7   | 62.2 $\pm$ 1.9   | 60.6 $\pm$ 2.2   |
| Amylose (g/100 g starch)                | 26.4 $\pm$ 0.3   | 26.1 $\pm$ 0.3   | 26.2 $\pm$ 0.4   | 26.7 $\pm$ 0.6   |
| Total pentosans (g/100 g)               | 6.2 $\pm$ 0.3    | 7.4 $\pm$ 0.5    | 6.4 $\pm$ 0.5    | 7.2 $\pm$ 0.3    |
| Soluble pentosans (g/100 g)             | 1.51 $\pm$ 0.11  | 1.87 $\pm$ 0.12  | 1.60 $\pm$ 0.11  | 1.58 $\pm$ 0.13  |
| Yellow pigment (mg/kg)                  | 6.2 $\pm$ 1.7    | 8.1 $\pm$ 2.3    | 7.3 $\pm$ 2.1    | 6.4 $\pm$ 1.8    |
| Dry gluten (g/100 g)                    | 1.28 $\pm$ 0.03  | 1.56 $\pm$ 0.14  | 1.29 $\pm$ 0.08  | 1.50 $\pm$ 0.10  |
| Falling number (s)                      | 365.7 $\pm$ 11.0 | 392.3 $\pm$ 21.7 | 403.7 $\pm$ 6.8  | 377.7 $\pm$ 23.7 |
| $\alpha$ -amylase activity (CU/g flour) | 0.20 $\pm$ 0.01  | 0.19 $\pm$ 0.015 | 0.16 $\pm$ 0.007 | 0.17 $\pm$ 0.004 |
| SDS sedimentation volume (mL)           | 83.7 $\pm$ 3.0   | 81.0 $\pm$ 5.4   | 76.8 $\pm$ 9.2   | 86.2 $\pm$ 3.4   |
| <b>Strain sweep test</b>                |                  |                  |                  |                  |
| Deformazione limite G' (%)              | 0.55 $\pm$ 0.06  | 0.60 $\pm$ 0.08  | 0.53 $\pm$ 0.08  | 0.62 $\pm$ 0.08  |
| Deformazione limite G'' (%)             | 0.74 $\pm$ 0.08  | 0.67 $\pm$ 0.06  | 0.69 $\pm$ 0.08  | 0.69 $\pm$ 0.06  |
| <b>Frequency sweep test</b>             |                  |                  |                  |                  |
| Storage modulus G' (Pa)                 | 8891 $\pm$ 719   | 10280 $\pm$ 967  | 9765 $\pm$ 799   | 8033 $\pm$ 374   |
| Loss modulus G'' (Pa)                   | 3803 $\pm$ 324   | 4802 $\pm$ 656   | 4283 $\pm$ 522   | 3728 $\pm$ 293   |
| Damping factor (G''/G')                 | 0.43 $\pm$ 0.01  | 0.46 $\pm$ 0.04  | 0.43 $\pm$ 0.02  | 0.46 $\pm$ 0.02  |
| <b>Bread</b>                            |                  |                  |                  |                  |
| Volume (cm <sup>3</sup> )               | 592 $\pm$ 41     | 920 $\pm$ 130    | 675 $\pm$ 40     | 671 $\pm$ 57     |
| Height (cm)                             | 90 $\pm$ 5       | 121 $\pm$ 10     | 100 $\pm$ 3      | 95 $\pm$ 5       |
| Weight (g)                              | 143 $\pm$ 3      | 141 $\pm$ 3      | 141 $\pm$ 2      | 142 $\pm$ 3      |
| Specific volume (cm <sup>3</sup> /g)    | 4.16 $\pm$ 0.23  | 6.59 $\pm$ 0.76  | 4.78 $\pm$ 0.22  | 4.71 $\pm$ 0.24  |
