# Supplementary material for: Breadmaking Performance of Elite Einkorn (Triticum monococcum L. subsp. monococcum) Lines: Evaluation of Flour, Dough and Bread Characteristics
Source: MDPI journal article supplement (doi:10.3390/foods12081610), 2023-04-10
Supplement: s1 [file s1]

**Table S5.** One-way ANOVA results (\*  $p \leq 0.05$ ; \*\*  $p \leq 0.01$ ; \*\*\*  $p \leq 0.001$ ) of porosity determined on the breads prepared from the SAL flours.

| VARIABLE            | GENOTYPE  | ERROR   |
|---------------------|-----------|---------|
| <i>d.f.</i>         | 2         | 15      |
| <b>C1</b>           |           |         |
| N° pores            | 3048.7    | 1029.4  |
| N° pores %          | 14.0      | 6.1     |
| Pores area          | 927.1*    | 153.7   |
| Pores area %        | 33.3      | 12.2    |
| Mean pores area     | 0.00033   | 0.00016 |
| Mean pores diameter | 0.00061** | 0.00008 |
| Pores shape         | 0.0235*** | 0.0017  |
| <b>C2</b>           |           |         |
| N° pores            | 2471.1*   | 601.9   |
| N° pores %          | 14.8      | 4.89    |
| Pores area          | 10530.3*  | 2754.5  |
| Pores area %        | 91.3***   | 8.6     |
| Mean pores area     | 0.00127   | 0.00550 |
| Mean pores diameter | 0.00137   | 0.00093 |
| Pores shape         | 0.05796** | 0.00550 |
| <b>C3</b>           |           |         |
| N° pores            | 74.1*     | 21.0    |
| N° pores %          | 1.3*      | 0.3     |
| Pores area          | 11680.1** | 1551.2  |
| Pores area %        | 159.8**   | 14.3    |
| Mean pores area     | 5.31      | 0.71    |
| Mean pores diameter | 0.08303   | 0.02472 |
| Pores shape         | 0.11577   | 0.13173 |

Porosity classes: C1 = 0.1-1 mm<sup>2</sup>, C2 = 1-5 mm<sup>2</sup>, C3 = >5 mm<sup>2</sup>.
