# Supplementary material for: Breadmaking Performance of Elite Einkorn (Triticum monococcum L. subsp. monococcum) Lines: Evaluation of Flour, Dough and Bread Characteristics
Source: MDPI journal article supplement (doi:10.3390/foods12081610), 2023-04-10
Supplement: s1 [file s1]

**Table S4.** One-way ANOVA results (\*  $p \leq 0.05$ ; \*\*  $p \leq 0.01$ ; \*\*\*  $p \leq 0.001$ ) of crust and crumb colour parameters determined on the breads prepared from the SAL flours.

| VARIABLE              | GENOTYPE   | ERROR |
|-----------------------|------------|-------|
| <i>d.f.</i>           | 2          | 21    |
| <b>Crust</b>          |            |       |
| $L^*$                 | 0.53       | 6.88  |
| $a^*$                 | 0.90*      | 0.21  |
| $B^*$                 | 4.77       | 4.14  |
| <b>Crumb</b>          |            |       |
| $L^*$                 | 0.26       | 1.45  |
| $a^*$                 | 11.48***   | 0.01  |
| $B^*$                 | 535.60***  | 0.21  |
| <b>Image Analysis</b> |            |       |
| R                     | 405.19***  | 26.15 |
| G                     | 115.66*    | 27.85 |
| B                     | 3966.58*** | 11.64 |
