# Supplementary material for: Breadmaking Performance of Elite Einkorn (Triticum monococcum L. subsp. monococcum) Lines: Evaluation of Flour, Dough and Bread Characteristics
Source: MDPI journal article supplement (doi:10.3390/foods12081610), 2023-04-10
Supplement: s1 [file s1]

**Table S1.** Cropping environments and field management information.

|                  | SAL          | SALbio          | LENObio         | Rome         |
|------------------|--------------|-----------------|-----------------|--------------|
| Management       | Conventional | Organic         | Organic         | Conventional |
| Soil             | Sandy        | Sandy           | Sandy-loamy     | Sandy-loamy  |
| Previous crop    | Maize        | Pea             | Barley          | Broad bean   |
| Nitrogen (kg/ha) | 40*          | 80 <sup>+</sup> | 80 <sup>+</sup> | 100*         |
| Harvesting date  | 17/7         | 15/7            | 16/7            | 11/7         |

\* ammonium nitrate (26% N; Yara Italia, Milan, Italy).

<sup>+</sup> Endurance N8 (8% N; Unimer, Vidor, TV, Italy), an organic nitrogen fertilizer. The organic nitrogen, from protein sources, derives from meat meal with a significant blood content. The meat meal is characterized by the presence of amino acids such as glycine, proline, alanine, glutamic acid and hydroxyproline, in addition to calcium phosphate. These elements are gradually made available to the crop by the microfauna present in the dried manure component. The blood, present in the mixture, contains proteins at their native state, a highly bioavailable source of organic nitrogen for the activity of microorganisms in the soil; in addition provides 0.5% iron (as iron sulphate) and 0.01% zinc (as zinc sulphate).

Temperature and rainfall of Sant' Angelo Lodigiano (SAL and SALbio), Leno (LENObio) and ROMA

|       | Mean Temperature (°C) |         |      | Rainfall (mm) |         |      |
|-------|-----------------------|---------|------|---------------|---------|------|
|       | SAL/SALbio            | LENObio | ROMA | SAL/SALbio    | LENObio | Roma |
| April | 13.8                  | 11.8    | 13.7 | 56.2          | 38.8    | 66.8 |
| May   | 18.8                  | 16.4    | 17.8 | 12.6          | 83.2    | 44.7 |
| June  | 23.6                  | 20.2    | 21.2 | 2.4           | 26.6    | 15.5 |
| July* | 26.2                  | 23.2    | 25.1 | 2.5           | 16.2    | 27.1 |

\*Up to July 14
