# Supplementary material for: Breadmaking Performance of Elite Einkorn (Triticum monococcum L. subsp. monococcum) Lines: Evaluation of Flour, Dough and Bread Characteristics
Source: MDPI journal article supplement (doi:10.3390/foods12081610), 2023-04-10
Supplement: s1 [file s1]

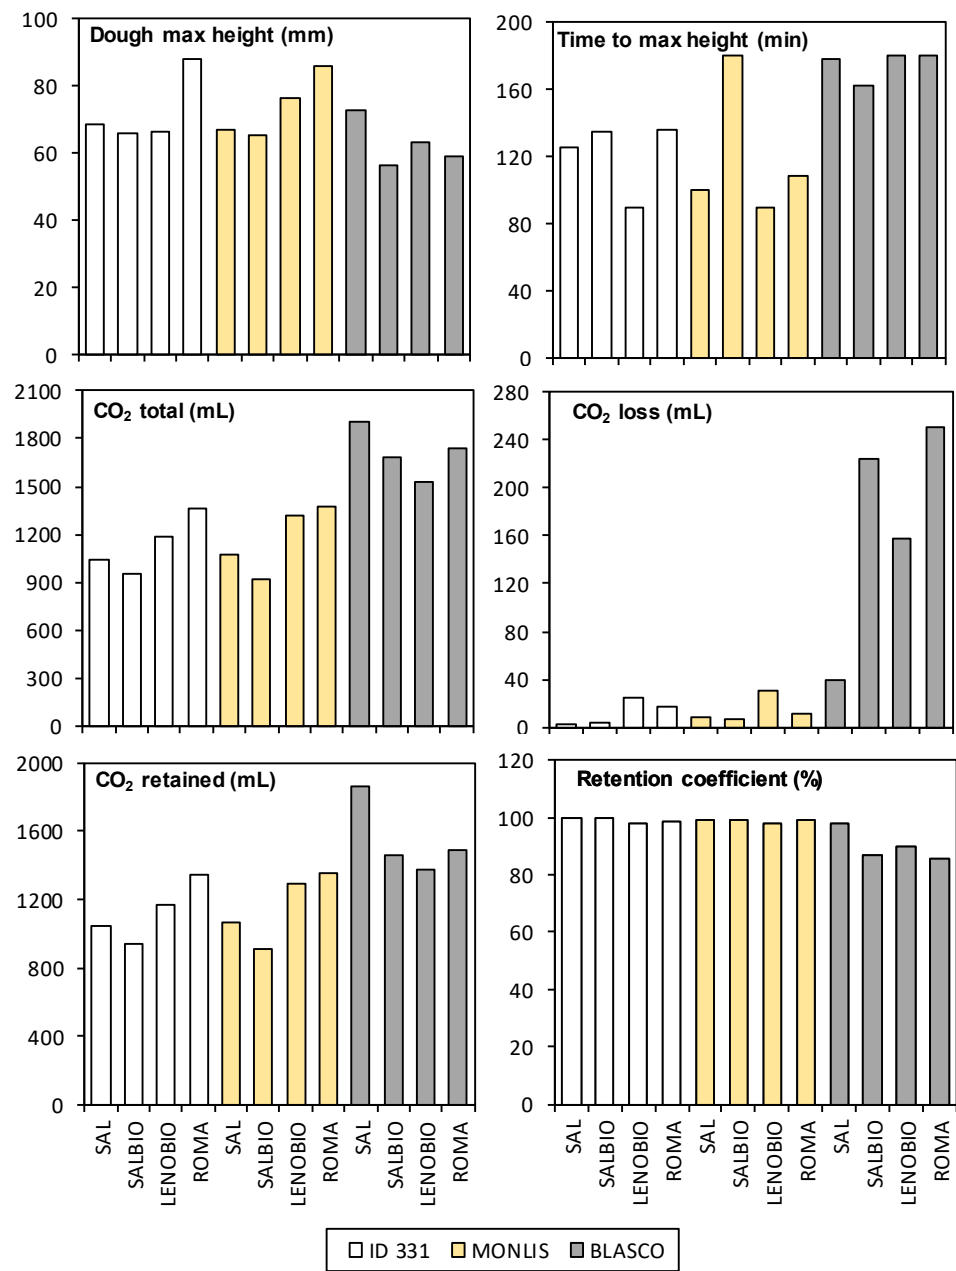

**Figure S2.** Reofermentographic results of flours of ID331, Monlis and Blasco cropped in four locations (SAL, SALbio, LENObio and ROMA).
