# Supplementary material for: Breadmaking Performance of Elite Einkorn (Triticum monococcum L. subsp. monococcum) Lines: Evaluation of Flour, Dough and Bread Characteristics
Source: MDPI journal article supplement (doi:10.3390/foods12081610), 2023-04-10
Supplement: s1 [file s1]

**Table S6.** Two-way ANOVA results (\*  $p \leq 0.05$ ; \*\*  $p \leq 0.01$ ; \*\*\*  $p \leq 0.001$ ) of texture profile analysis parameters.

| VARIABLE      | GENOTYPE (G) | TIME (E)   | GxT        | ERROR   |
|---------------|--------------|------------|------------|---------|
|               | <i>d.f.</i>  |            |            |         |
|               | 2            | 3          | 6          | 59      |
| Young modulus | 0.00129***   | 0.00628*** | 0.00016*** | 0.00003 |
| Hardness      | 146.24***    | 185.46***  | 10.38***   | 0.031   |
| Elasticity    | 0.00015      | 0.00416*** | 0.00011    | 0.00006 |
| Cohesiveness  | 0.00091      | 0.27224*** | 0.00400*** | 0.00031 |
| Gumminess     | 68.08***     | 36.76***   | 3.76***    | 0.15    |
| Chewiness     | 63.15***     | 31.51***   | 3.37***    | 0.14    |
