# Supplementary material for: Breadmaking Performance of Elite Einkorn (Triticum monococcum L. subsp. monococcum) Lines: Evaluation of Flour, Dough and Bread Characteristics
Source: Foods. 2023 Apr 10;12(8):1610. doi: 10.3390/foods12081610 (PMC10137832; doi:10.3390/foods12081610)
Supplement: Supplementary file 1 [file foods-12-01610-s001.zip]

Archive with 8 entries (8 files):
- Figure S1.pdf
- Figure S2.pdf
- Table S1 environment new.pdf
- Table S2 flour ANOVA new.pdf
- Table S3 environment means new.pdf
- Table S4 colour ANOVA new.pdf
- Table S5 pores ANOVA new.pdf
- Table S6- Texture ANOVA new.pdf
